# Supplementary material
Source: PubMed Central journal article supplement (PMC4667702)
Supplement: ncomms9670-s1.pdf [file ncomms9670-s1.pdf]

## Supplementary Information: Figures &amp; Table

- **Supplementary Figures**

## Supplementary Fig. 1

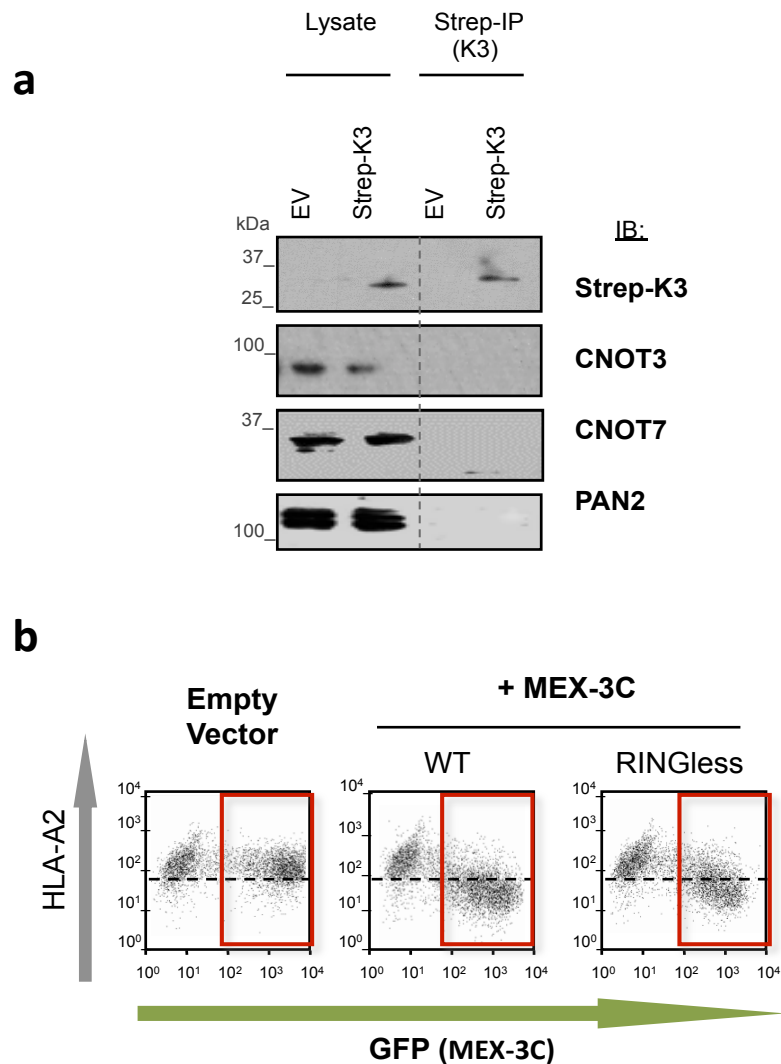**Supplementary Fig. 1:**

**a**, Pull-down (IP) of Strep-tagged K3, an unrelated E3 ligase from KSHV, serves as a non-specific control for mass spectrometry experiments (**Figure 1a-b**). EV: Empty vector.

**b**, Flow cytometric analysis of HEK293T cells expressing Empty Vector (+GFP) control, WT or RINGless MEX-3C. (GFP is used as a surrogate marker for MEX-3C expression). Figure controls for MEX-3C expression and depicts FACS sorted population (red box) for **Figure 1c**.

**Supplementary Fig. 2**

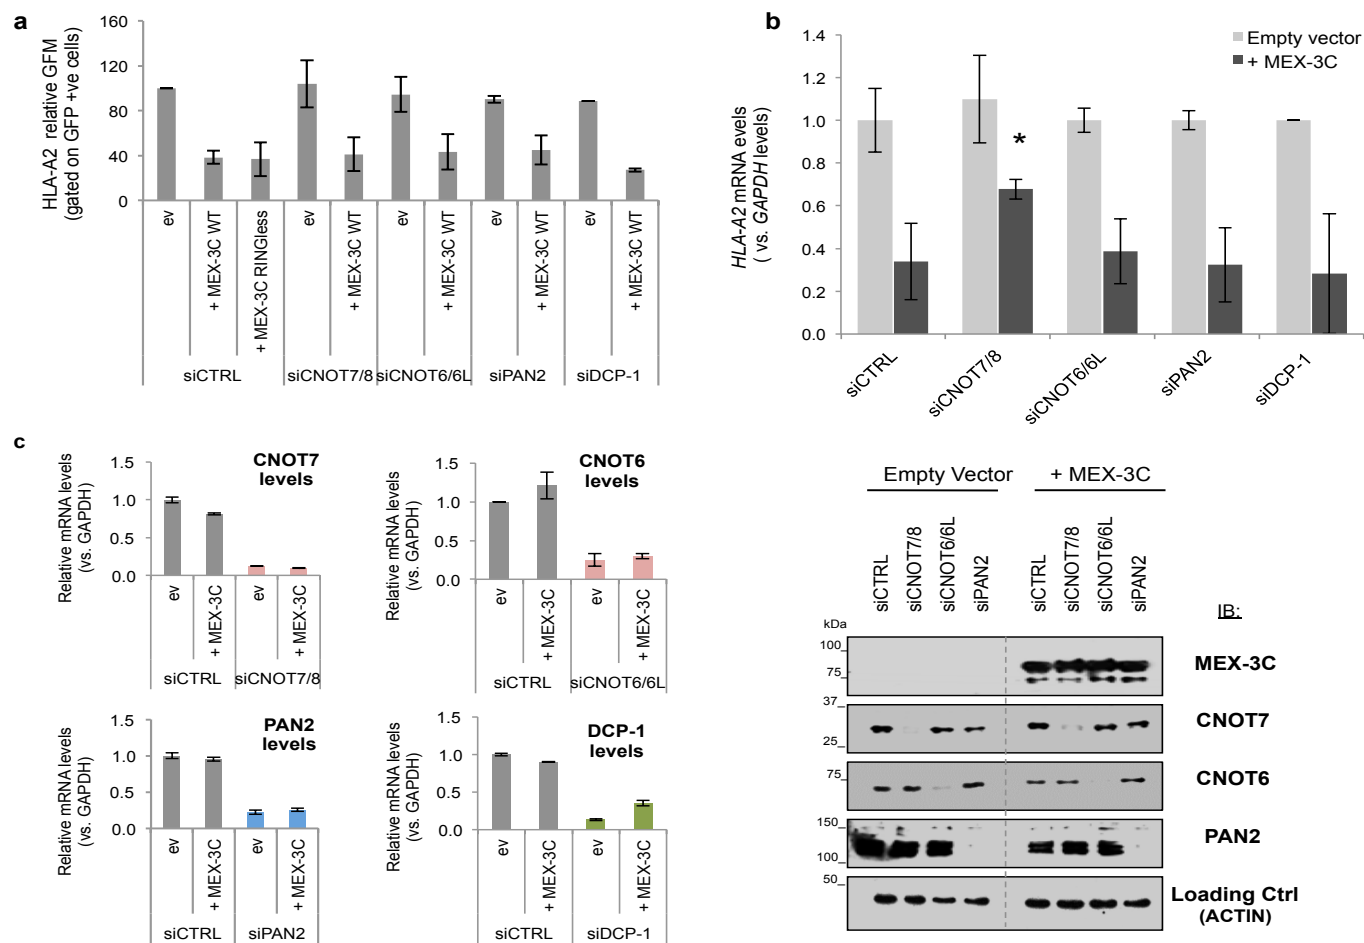

**Supplementary Fig. 2:**

**a**, Quantification of HLA-A2 geometric fluorescent means (GFM) in siRNA-treated HEK293T cells expressing wtMEX-3C (or empty vector control). GFP acts as a surrogate marker for MEX-3C expression. Figure refers to **Figure 2a**.

**b**, Depletion of CNOT7/8(Caf1) rescues MEX-3C-mediated degradation of endogenous *HLA-A2* mRNA levels, as analysed by qRT-PCR. Results are relative to siControl and expressed as mean  $\pm$  SD of 3 independent experiments. \*: P<0.05 vs. + MEX-3C + siCONTROL.

**c**, Efficacy of the siRNA knockdowns in **Figure 2**, assessed by qRT-PCR (left panel) and western blot (right panel) .

**Supplementary Fig. 3**

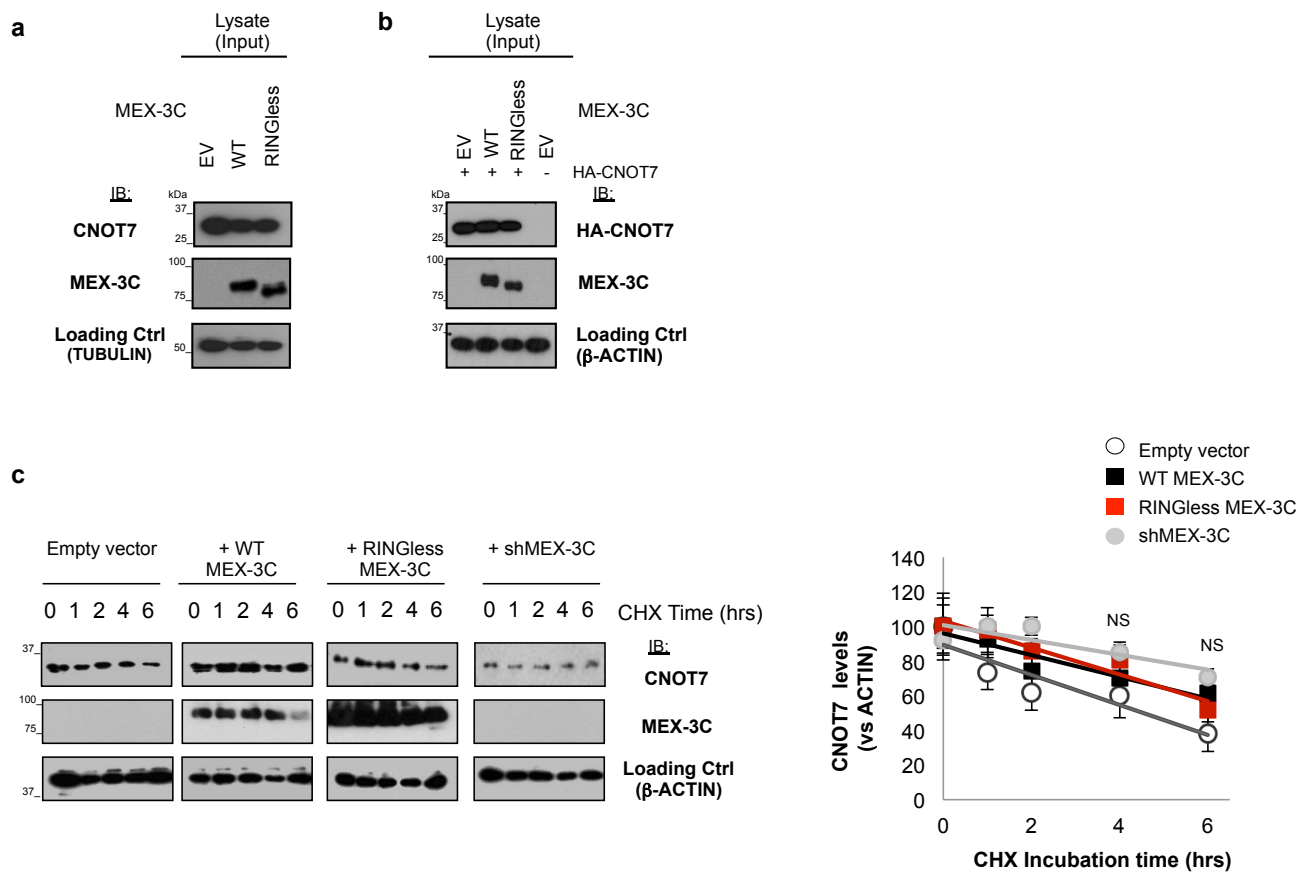

**Supplementary Fig. 3:**

**a-b**, Immunoblot analysis of MEX-3C and CNOT7(Caf1) in HEK293T cells expressing the different tagged constructs. The blots refer to input (lysate) protein levels of **Fig. 4a-b**.

**c**, MEX-3C's E3 ligase activity does not affect CNOT7 protein half-life. HEK293T cells were incubated with Cycloheximide (CHX) at 100  $\mu$ g/ml for 0, 1, 2, 4 and 6 hours. **Left Panel** shows immunoblot (IB) analysis of MEX-3C, CNOT7 (endogenous) and ACTIN levels after CHX treatment. Neither depletion (shRNAmir against MEX-3C, shMEX-3C) nor overexpression of WT or RINGless MEX-3C affected the half-life of CNOT7. **Right Panel:** Quantification of CNOT7's protein levels after CHX treatment. Results are expressed as % of input levels (at Time 0 hrs) and relative to loading control (ACTIN) levels. Results are the mean  $\pm$  SD of three independent experiments. NS: not statistically significant.

Supplementary Fig. 4

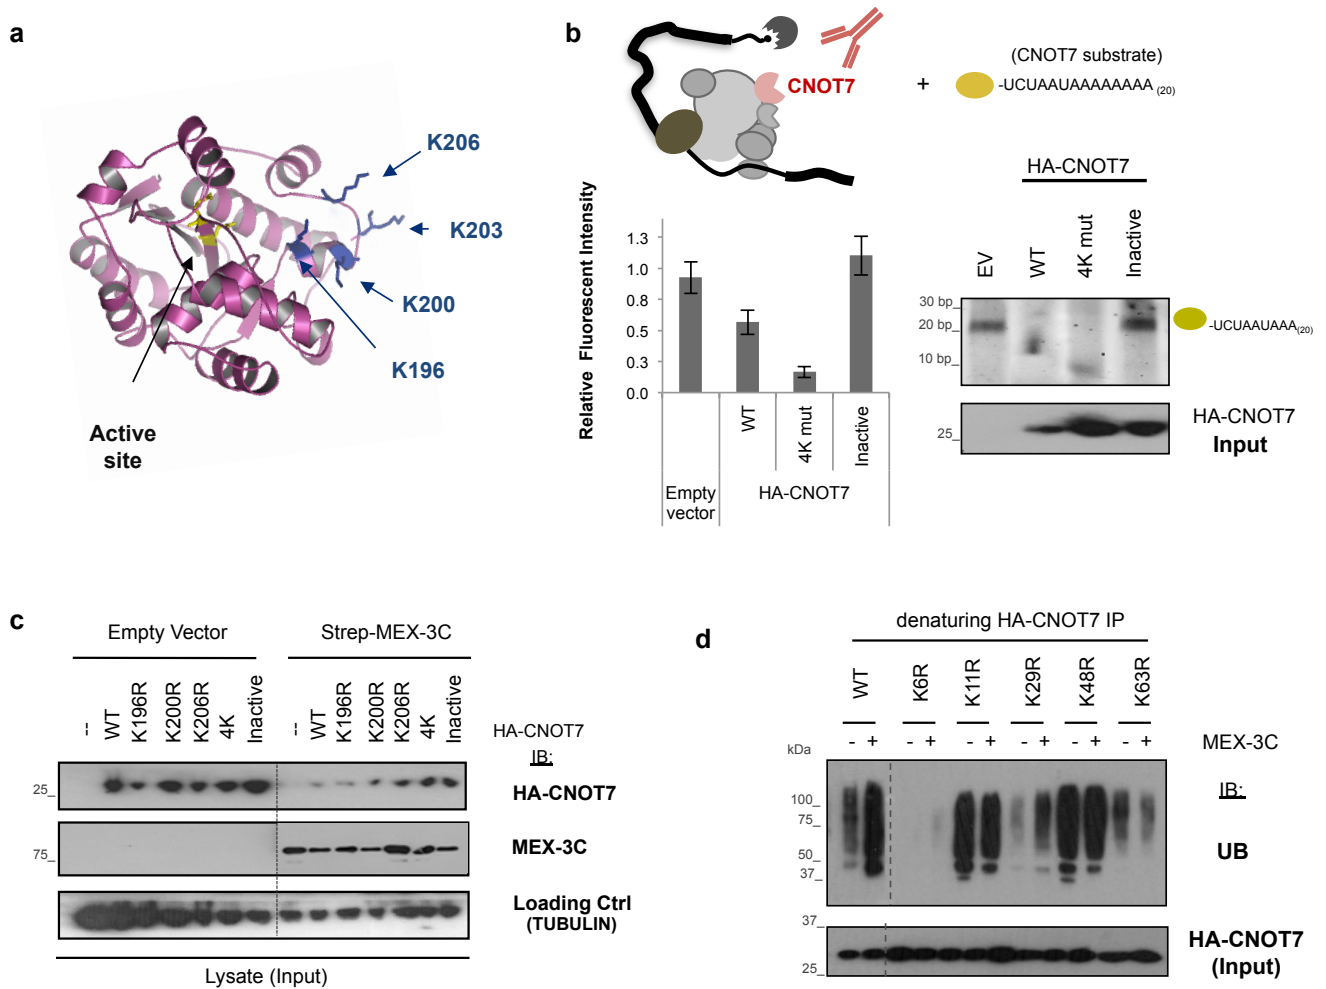

Supplementary Fig. 4:

**a**, Diagrammatic representation of CNOT7(Caf1)'s structure<sup>11</sup> highlighting in blue the lysine residues mutated in **Figure 4**. Residues in active site (mutated in catalytic inactive mutant) are shown in yellow.

**b**, Deadenylation assays for CNOT7(Caf1) mutants, in the absence of MEX-3C. Inactive: CNOT7 catalytic inactive mutant D40A/E42A. Assays were performed as described in Suzuki et al., 2010<sup>10</sup>. Briefly, eluates from HA-CNOT7 pull-downs were incubated with a 5'-fluorescein labelled specific RNA substrate (Flc-5'-UCUAAAUA<sub>20</sub>) to assay the deadenylation activity of CNOT7. Degradation of 5'-fluorescein-labelled RNA substrate was visualised by denaturing polyacrylamide gel electrophoresis (Right Panel). (Right panel also shows loading controls for the assay). Left Panel shows quantification of the substrate's fluorescence intensity remaining after deadenylation reaction. Results are expressed as mean  $\pm$  SD of 3 independent experiments.

**c**, Immunoblot (IB) analysis of MEX-3C and CNOT7(Caf1) levels in HEK293T cells expressing the different tagged constructs. The blots refer to input (lysate) protein levels of **Fig. 4e**.

**d**, Ubiquitin blots following immunoprecipitation (IP) of HA-CNOT7 under denaturing conditions. Cells expressing wild-type or mutant ubiquitin-GFP constructs were lysed under denaturing conditions, immunoprecipitated for HA-CNOT7 and immunoblotted for ubiquitin. IB: Immunoblot.

## Supplementary Figure 5:

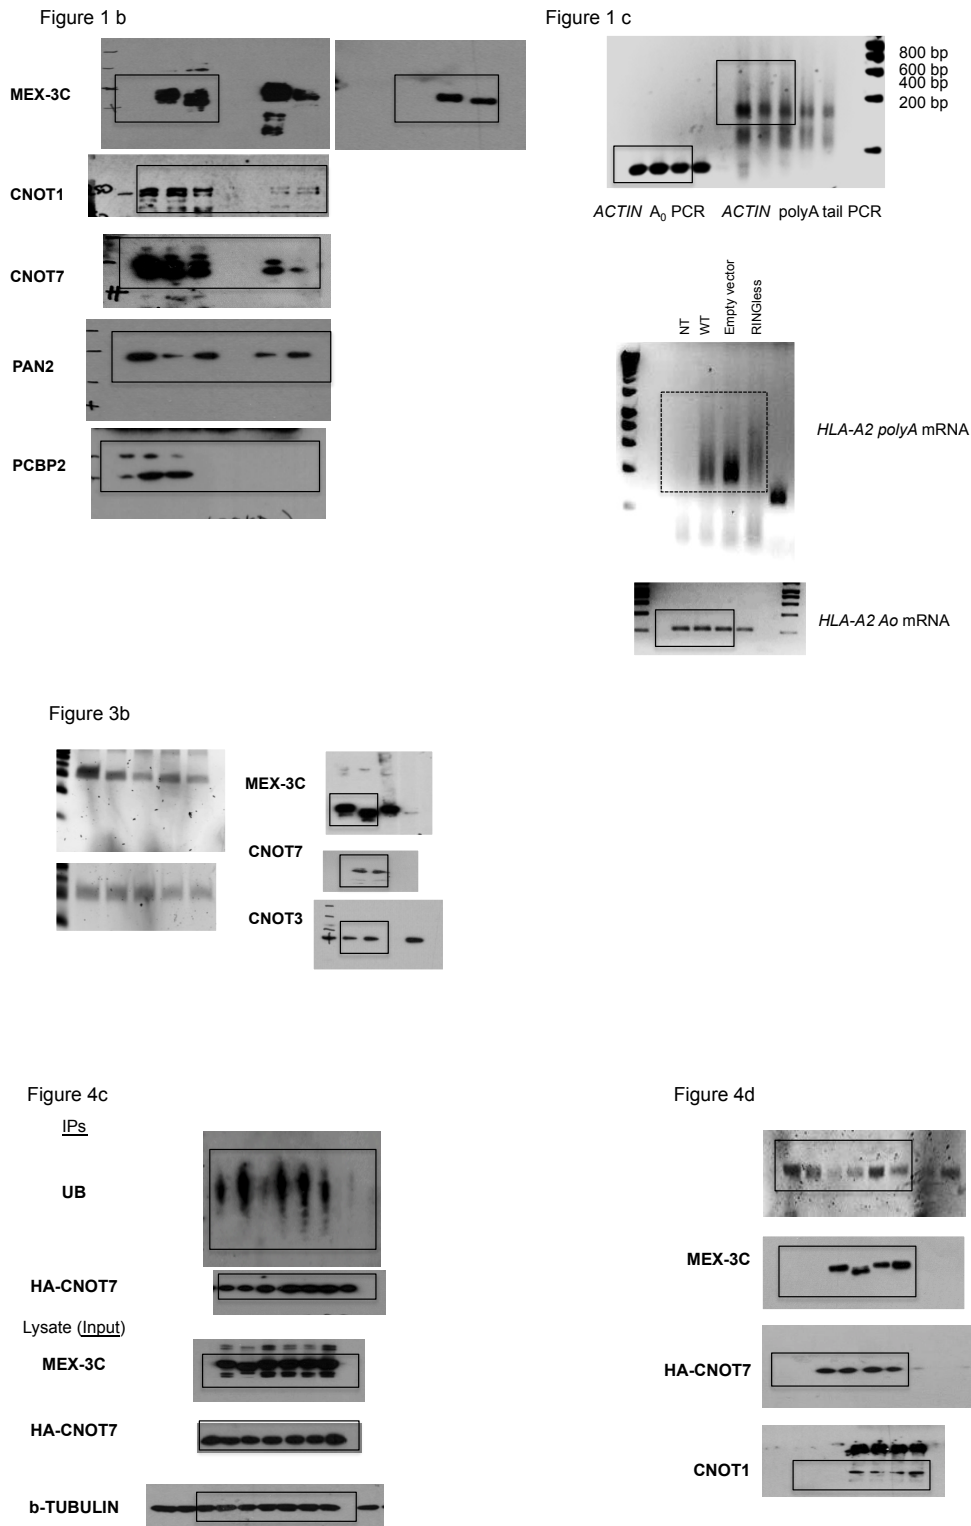

## Supplementary Figure 5:

Uncropped images of Western blots and gels from Figures 1b, 1c, 3b, 4c and 4d. Antibodies used for immunoblotting are indicated next to the corresponding blot. Note: The original gels are shown. In Figure 1C, lanes 2 and 3 have been reordered in order to make it consistent with the rest of the figure.

• **Supplementary Table 1**

Mass Spectrometry analysis of Strep-RINGless MEX-3C pull-down in HEK293T cells.

| Name              | Description                                                | UniProtKBAccession <sup>a</sup> | MW [kDa]     | Score <sup>b</sup> |
|-------------------|------------------------------------------------------------|---------------------------------|--------------|--------------------|
| <b>MEX-3C</b>     | <b>RNA-binding protein MEX3C</b>                           | <b>Q5U5Q3</b>                   | <b>69.3</b>  | <b>7492.52</b>     |
| ADAR1             | Double-stranded RNA-specific adenosine deaminase           | P55265                          | 103.6        | 123.42             |
| AIFM1             | Apoptosis-inducing factor 1, mitochondrial                 | O95831                          | 66.3         | 60.00              |
| AP2A1b            | AP-2 complex subunit alpha-1                               | O95782                          | 105.3        | 146.03             |
| AP2A2             | AP-2 complex subunit alpha-2                               | O94973                          | 103.9        | 185.35             |
| AP2B1             | AP-2 complex subunit beta                                  | P63010                          | 104.5        | 215.50             |
| ATAD3A            | ATPase family AAA domain-containing protein 3A             | Q9NVI7                          | 66.2         | 107.56             |
| ATXN2L            | Ataxin-2-like protein                                      | Q8WWM7                          | 102.8        | 73.04              |
| BMS1              | Ribosome biogenesis protein BMS1 homolog                   | Q14692                          | 145.7        | 192.75             |
| C1TC              | C-1-tetrahydrofolate synthase, cytoplasmic                 | P11586                          | 101.5        | 97.37              |
| CAD               | CAD protein                                                | P27708                          | 235.9        | 225.15             |
| CCAR2             | Protein KIAA1967; CCAR2                                    | Q8N163                          | 102.8        | 208.53             |
| <b>CNOT1</b>      | <b>CCR4-NOT transcription complex subunit 1</b>            | <b>A5YKK6</b>                   | <b>266.8</b> | <b>142.47</b>      |
| <b>CNOT3</b>      | <b>CCR4-NOT transcription complex subunit 3</b>            | <b>O75175</b>                   | <b>60.9</b>  | <b>59.03</b>       |
| DHX37             | ATP-dependent RNA helicase DHX37                           | Q8IY37                          | 129.5        | 79.18              |
| DNAPK             | DNA-dependent protein kinase catalytic subunit             | P78527                          | 468.8        | 690.12             |
| EEF1A1            | Elongation factor 1-alpha                                  | P68104                          | 47.8         | 78.29              |
| eIF3a             | Eukaryotic translation initiation factor 3 subunit A       | Q14152                          | 166.5        | 112.41             |
| GIGYF2; TNRC15    | GRB10 interacting GYF protein 2 isoform c                  | Q6Y7W6                          | 149.4        | 188.92             |
| GLE1              | Nucleoporin GLE1                                           | Q53GS7                          | 79.8         | 70.67              |
| GTPB1; GP-1       | GTP-binding protein 1                                      | O00178                          | 72.4         | 93.35              |
| HnRNPUL2          | Heterogeneous nuclear ribonucleoprotein U-like protein 2   | Q1KMD3                          | 85.1         | 96.17              |
| HSPA5; BiP        | HSPA5 protein                                              | P11021                          | 72.4         | 515.90             |
| ILF3; NF90; NFAR; | Interleukin enhancer-binding factor 3                      | Q12906                          | 76.5         | 88.78              |
| LENG8             | Leukocyte receptor cluster member 8                        | Q96PV6                          | 88.1         | 69.84              |
| LRPPRC            | Leucine-rich PPR motif-containing protein, mitochondrial   | P42704                          | 157.8        | 78.96              |
| MARK3; C-TAK1     | MAP/microtubule affinity-regulating kinase 2 isoform f     | P27448                          | 79.4         | 148.20             |
| MRPS30            | 28S ribosomal protein S30, mitochondrial                   | Q9NP92                          | 50.3         | 141.07             |
| MYCBP2            | E3 ubiquitin-protein ligase MYCBP2                         | O75592                          | 509.4        | 396.12             |
| MYO1C             | Myosin-Ic                                                  | O00159                          | 119.6        | 130.20             |
| NOL6              | Nucleolar protein 6                                        | Q9H6R4                          | 113.8        | 136.10             |
| NUFIP2            | Nuclear fragile X mental retardation-interacting protein 2 | Q7Z417                          | 76.1         | 117.78             |
| NXF1              | nuclear RNA export factor 1 isoform 2                      | Q9UBU9                          | 40.5         | 97.50              |
| POLRMT            | DNA-directed RNA polymerase, mitochondrial                 | O00411                          | 140.1        | 280.63             |

|                | precursor                                 |        |       |        |
|----------------|-------------------------------------------|--------|-------|--------|
| PRP6           | Pre-mRNA-processing factor 6              | O94906 | 106.9 | 105.25 |
| PRPF8          | Pre-mRNA-processing-splicing factor 8     | Q6P2Q9 | 273.4 | 264.98 |
| RBM19          | RNA-binding protein 19                    | Q9Y4C8 | 107.3 | 169.91 |
| SAFB2          | Scaffold attachment factor B2             | Q14151 | 107.4 | 136.44 |
| TIF-1b; TRIM28 | Transcription intermediary factor 1-beta  | Q13263 | 88.5  | 158.60 |
| WDR6           | WD repeat-containing protein 6            | Q9NNW5 | 121.6 | 120.92 |
| ZAP: ZC3HAV1   | Zinc finger CCCH-type antiviral protein 1 | Q7Z2W4 | 90.2  | 78.88  |
| ZNF574         | Zinc finger protein 574                   | Q6ZN55 | 98.8  | 94.63  |

**Supplementary Table 1:**

HEK293Ts were transfected with wt or RINGless Strep-His-MEX-3C, lysed in 1% NP-40 and immunoprecipitated (IP) on Streptactin beads. Immunoprecipitations (IPs) were done in the presence of 20U/ml RNase-I. Co-IPed proteins were digested using the FASP protocol and analysed by LC-MSMS. Raw spectra were processed using Proteome Discoverer 1.2 and searched against a Uniprot Human database using Mascot Daemon 2.3.2. A peptide FDR of 0.05 was applied and reported proteins required a minimum of 2 peptides. For reported proteins the UniProt accession<sup>a</sup> and Mascot score<sup>b</sup> are shown. Proteins with a score higher than 40 are shown.
